# Supplementary material for: Patient-Specific Planning for Thermal Magnetic Resonance of Glioblastoma Multiforme
Source: PubMed Central journal article supplement (PMC8070230; doi:10.3390/cancers13081867), 2021-04-14
Supplement: cancers-13-01867-s001.pdf [file cancers-13-01867-s001.pdf]

Article

# Supplementary Materials: Patient-Specific Planning for Thermal Magnetic Resonance of Glioblastoma Multiforme

Eva Oberacker, Cecilia Diesch, Jacek Nadobny, Andre Kuehne, Peter Wust, Pirus Ghadjar and Thoralf Niendorf

**Supplementary Tables.** Full hyperthermia treatment planning results for all patient models, RF applicator designs and optimization algorithms. The highest value of each metric per patient model and optimization algorithm is highlighted in bold. The inter-algorithm maximum is further highlighted by green font. The overall (inter-algorithm and inter-patient) maximum is further highlighted by a green background.

**Table S1.** Full VOP power optimization HTP results.

|             |                                  | VOP Power Optimization |        |              |            |             |              |             |         |           |             |
|-------------|----------------------------------|------------------------|--------|--------------|------------|-------------|--------------|-------------|---------|-----------|-------------|
|             |                                  | 8.P.R                  | 16.P.R | 16.I.R       | 16.I.E     | 16.2R.R     | 16.2R.E      | 32.2R.R     | 32.2R.E | 16.I.R.WB | 16.I.E.WB   |
| Pat Model 1 | SAR <sub>max</sub> (TV)          | 57.3                   | 73.4   | 96.4         | 94.8       | 100.3       | <b>108.3</b> | 70.7        | 85.6    | 104.6     | 79.9        |
|             | SAF                              | 2.0                    | 2.0    | 2.7          | 2.9        | 2.9         | 3.5          | 2.4         | 3.0     | 3.1       | <b>3.8</b>  |
|             | TC <sub>SAR&gt;Lim</sub>         | 18.8                   | 37.2   | 45.5         | 43.0       | <b>59.1</b> | 55.6         | 47.9        | 50.2    | 32.5      | 46.3        |
|             | THQ                              | 0.8                    | 1.0    | 1.2          | 1.2        | <b>1.3</b>  | 1.3          | 1.2         | 1.2     | 1.0       | 1.1         |
|             | P <sub>TV</sub> /V <sub>TV</sub> | 26.5                   | 33.2   | 36.7         | 36.1       | <b>41.2</b> | <b>41.2</b>  | 35.6        | 38.4    | 32.6      | 37.8        |
|             | # of excitations                 | 2                      | 2      | 2            | 1          | 1           | 2            | 2           | 2       | 2         | 1           |
| Pat Model 2 | SAR <sub>max</sub> (TV)          | 50.0                   | 46.1   | 49.6         | 52.7       | 58.7        | <b>60.5</b>  | 57.6        | 57.4    |           | 52.3        |
|             | SAF                              | 2.6                    | 2.2    | 2.8          | 3.0        | 3.8         | 3.2          | 3.3         | 3.5     |           | <b>4.3</b>  |
|             | TC <sub>SAR&gt;Lim</sub>         | 16.2                   | 8.5    | 18.7         | 18.5       | 28.0        | <b>30.4</b>  | 27.3        | 23.6    |           | 25.5        |
|             | THQ                              | 0.9                    | 0.9    | 1.0          | 1.0        | <b>1.1</b>  | 1.1          | 1.0         | 1.1     |           | 1.0         |
|             | P <sub>TV</sub> /V <sub>TV</sub> | 25.2                   | 23.5   | 27.1         | 26.9       | 29.1        | 28.1         | 27.2        | 27.2    |           | <b>29.3</b> |
|             | # of excitations                 | 2                      | 2      | 2            | 2          | 1           | 2            | 2           | 1       |           | 1           |
| Pat Model 3 | SAR <sub>max</sub> (TV)          | 59.8                   | 76.4   | 77.2         | 82.3       | 92.6        | <b>96.2</b>  | 93.2        | 83.7    |           | 90.4        |
|             | SAF                              | 2.0                    | 2.1    | 2.7          | 2.6        | 2.7         | 2.7          | 2.9         | 2.8     |           | <b>3.5</b>  |
|             | TC <sub>SAR&gt;Lim</sub>         | 26.2                   | 45.2   | 38.4         | 45.6       | 67.0        | 71.4         | <b>76.0</b> | 58.6    |           | 58.4        |
|             | THQ                              | 0.9                    | 1.1    | 1.2          | 1.2        | <b>1.3</b>  | 1.3          | <b>1.3</b>  | 1.3     |           | 1.2         |
|             | P <sub>TV</sub> /V <sub>TV</sub> | 28.0                   | 37.0   | 36.0         | 38.1       | 43.4        | <b>44.8</b>  | 44.2        | 40.4    |           | 41.8        |
|             | # of excitations                 | 2                      | 2      | 1            | 1          | 1           | 1            | 1           | 1       |           | 1           |
| Pat Model 4 | SAR <sub>max</sub> (TV)          |                        |        | 50.0         | 49.4       | 49.0        | 51.5         |             |         |           | <b>54.9</b> |
|             | SAF                              |                        |        | 3.0          | 2.9        | 2.7         | 2.4          |             |         |           | <b>3.2</b>  |
|             | TC <sub>SAR&gt;Lim</sub>         |                        |        | 22.4         | 22.3       | 20.0        | 21.6         |             |         |           | <b>34.1</b> |
|             | THQ                              |                        |        | 0.9          | 0.9        | 0.9         | 0.9          |             |         |           | <b>1.0</b>  |
|             | P <sub>TV</sub> /V <sub>TV</sub> |                        |        | 30.2         | 30.0       | 29.7        | 3.6          |             |         |           | <b>33.0</b> |
|             | # of excitations                 |                        |        | 1            | 1          | 2           | 2            |             |         |           | 1           |
| Pat Model 5 | SAR <sub>max</sub> (TV)          |                        |        | 44.0         | 46.5       | <b>71.8</b> | 48.5         |             |         |           | 52.5        |
|             | SAF                              |                        |        | 2.8          | 2.8        | 4.3         | 3.3          |             |         |           | <b>5.2</b>  |
|             | TC <sub>SAR&gt;Lim</sub>         |                        |        | 8.8          | 12.8       | <b>42.2</b> | 22.4         |             |         |           | 26.9        |
|             | THQ                              |                        |        | 0.9          | 1.0        | <b>1.2</b>  | 1.0          |             |         |           | 1.0         |
|             | P <sub>TV</sub> /V <sub>TV</sub> |                        |        | 26.8         | 27.7       | <b>38.2</b> | 28.2         |             |         |           | 28.6        |
|             | # of excitations                 |                        |        | 2            | 2          | 1           | 1            |             |         |           | 1           |
| Pat Model 6 | SAR <sub>max</sub> (TV)          |                        |        | <b>114.8</b> | 83.1       | 100.1       | 80.9         |             |         |           |             |
|             | SAF                              |                        |        | 4.6          | <b>5.1</b> | <b>5.8</b>  | 4.9          |             |         |           |             |
|             | TC <sub>SAR&gt;Lim</sub>         |                        |        | <b>65.8</b>  | 40.8       | 41.9        | 35.5         |             |         |           |             |

|             |                                  |             |             |             |             |
|-------------|----------------------------------|-------------|-------------|-------------|-------------|
|             | THQ                              | <b>1.5</b>  | 1.4         | 1.4         | 1.3         |
|             | P <sub>TV</sub> /V <sub>TV</sub> | <b>46.1</b> | 37.9        | 40.2        | 36.1        |
|             | # of excitations                 | 1           | 1           | 1           | 1           |
| Pat Model 7 | SAR <sub>max</sub> (TV)          | 70.9        | 86.5        | <b>91.2</b> | 73.4        |
|             | SAF                              | 4.0         | 4.4         | 4.3         | <b>4.9</b>  |
|             | TC <sub>SAR&gt;Lim</sub>         | 44.3        | 61.0        | <b>72.1</b> | 41.9        |
|             | THQ                              | 1.2         | 1.4         | <b>1.4</b>  | 1.4         |
|             | P <sub>TV</sub> /V <sub>TV</sub> | 34.0        | 39.7        | <b>42.5</b> | 33.8        |
|             | # of excitations                 | 1           | 1           | 1           | 1           |
| Pat Model 8 | SAR <sub>max</sub> (TV)          | 68.1        | 78.8        | <b>86.3</b> | 78.9        |
|             | SAF                              | <b>2.9</b>  | 2.7         | 2.4         | 2.5         |
|             | TC <sub>SAR&gt;Lim</sub>         | 28.5        | <b>46.9</b> | 37.2        | 36.8        |
|             | THQ                              | 1.0         | <b>1.1</b>  | 1.1         | 1.0         |
|             | P <sub>TV</sub> /V <sub>TV</sub> | 29.6        | <b>34.6</b> | 32.4        | 32.6        |
|             | # of excitations                 | 2           | 2           | 2           | 2           |
| Pat Model 9 | SAR <sub>max</sub> (TV)          | 74.9        | 79.2        | 88.8        | <b>93.9</b> |
|             | SAF                              | 2.2         | 2.3         | 2.5         | <b>2.7</b>  |
|             | TC <sub>SAR&gt;Lim</sub>         | 44.8        | 49.1        | 60.2        | <b>60.3</b> |
|             | THQ                              | 1.1         | 1.1         | 1.3         | <b>1.3</b>  |
|             | P <sub>TV</sub> /V <sub>TV</sub> | 37.8        | 39.5        | 44.3        | <b>44.8</b> |
|             | # of excitations                 | 2           | 3           | 3           | 3           |

The highest value of each metric per patient model and optimization algorithm is highlighted in bold. The inter-algorithm maximum is further highlighted by green font. The overall (inter-algorithm and inter-patient) maximum is further highlighted by a green background.

Table S2. Full VOP uniformity optimization HTP results.

|             |                                  | VOP Uniformity Optimization |        |             |            |             |             |         |            |              |            |
|-------------|----------------------------------|-----------------------------|--------|-------------|------------|-------------|-------------|---------|------------|--------------|------------|
|             |                                  | 8.P.R                       | 16.P.R | 16.I.R      | 16.I.E     | 16.2R.R     | 16.2R.E     | 32.2R.R | 32.2R.E    | 16.I.R.WB    | 16.I.E.WB  |
| Pat Model 1 | SAR <sub>max</sub> (TV)          | 45.2                        | 61.1   | 82.4        | 80.9       | 75.5        | 91.3        | 59.6    | 85.4       | <b>101.1</b> | 69.5       |
|             | SAF                              | 1.8                         | 2.1    | 2.4         | 2.6        | 2.6         | 3.0         | 2.5     | <b>3.5</b> | 3.0          | 3.0        |
|             | TC <sub>SAR&gt;Lim</sub>         | 3.2                         | 20.5   | 47.5        | 45.8       | <b>49.6</b> | 46.7        | 31.9    | 43.7       | 29.7         | 29.9       |
|             | THQ                              | 0.8                         | 1.0    | 1.1         | 1.1        | 1.1         | <b>1.2</b>  | 1.0     | 1.1        | 1.0          | 0.9        |
|             | P <sub>TV</sub> /V <sub>TV</sub> | 24.5                        | 29.5   | 36.0        | 36.2       | 36.0        | <b>37.4</b> | 32.0    | 36.1       | 31.7         | 33.8       |
|             | # of excitations                 | 2                           | 2      | 2           | 2          | 2           | 3           | 2       | 2          | 2            | 3          |
| Pat Model 2 | SAR <sub>max</sub> (TV)          | 50.4                        | 47.6   | 50.7        | 50.7       | 58.6        | <b>59.5</b> | 49.3    | 54.4       |              | 41.9       |
|             | SAF                              | 2.3                         | 2.5    | 3.1         | 2.9        | 3.8         | 3.1         | 2.8     | 3.4        |              | <b>3.8</b> |
|             | TC <sub>SAR&gt;Lim</sub>         | 13.3                        | 8.9    | 13.9        | 12.9       | <b>28.6</b> | 25.9        | 13.7    | 20.5       |              | 0.3        |
|             | THQ                              | 0.8                         | 0.8    | 0.9         | 0.9        | <b>1.0</b>  | 1.0         | 0.9     | 1.0        |              | 0.8        |
|             | P <sub>TV</sub> /V <sub>TV</sub> | 22.6                        | 21.1   | 24.8        | 25.3       | <b>28.4</b> | 26.2        | 23.1    | 25.4       |              | 23.9       |
|             | # of excitations                 | 3                           | 1      | 1           | 2          | 1           | 2           | 2       | 2          |              | 2          |
| Pat Model 3 | SAR <sub>max</sub> (TV)          | 49.9                        | 74.4   | 75.5        | 75.8       | 73.9        | <b>82.7</b> | 74.2    | 68.3       |              | 81.4       |
|             | SAF                              | 2.2                         | 2.0    | 2.3         | 2.4        | 2.4         | 2.3         | 2.3     | 2.5        |              | <b>3.4</b> |
|             | TC <sub>SAR&gt;Lim</sub>         | 11.1                        | 43.3   | 44.1        | 43.3       | 44.2        | <b>51.3</b> | 48.7    | 36.7       |              | 46.8       |
|             | THQ                              | 0.9                         | 1.1    | 1.2         | 1.2        | 1.1         | <b>1.2</b>  | 1.2     | 1.1        |              | 1.2        |
|             | P <sub>TV</sub> /V <sub>TV</sub> | 22.4                        | 36.8   | 37.1        | 36.7       | 37.0        | <b>39.4</b> | 37.6    | 34.6       |              | 38.7       |
|             | # of excitations                 | 2                           | 2      | 2           | 2          | 2           | 2           | 3       | 2          |              | 2          |
| Pat Model 4 | SAR <sub>max</sub> (TV)          |                             |        | 44.1        | 43.6       | <b>47.2</b> | <b>47.2</b> |         |            |              | 44.7       |
|             | SAF                              |                             |        | 2.5         | 2.3        | 2.3         | 2.1         |         |            |              | <b>2.9</b> |
|             | TC <sub>SAR&gt;Lim</sub>         |                             |        | 5.4         | 2.7        | <b>12.1</b> | 10.4        |         |            |              | 6.6        |
|             | THQ                              |                             |        | 0.9         | 0.9        | <b>0.9</b>  | 0.9         |         |            |              | 0.9        |
|             | P <sub>TV</sub> /V <sub>TV</sub> |                             |        | 28.1        | 27.2       | <b>29.9</b> | 29.0        |         |            |              | 28.3       |
|             | # of excitations                 |                             |        | 2           | 2          | 2           | 2           |         |            |              | 2          |
| Pat Model 5 | SAR <sub>max</sub> (TV)          |                             |        | 39.3        | 41.3       | <b>54.1</b> | 42.6        |         |            |              | 51.2       |
|             | SAF                              |                             |        | 2.3         | 2.2        | 2.9         | 2.7         |         |            |              | <b>3.7</b> |
|             | TC <sub>SAR&gt;Lim</sub>         |                             |        | 0.0         | 0.7        | <b>26.0</b> | 2.7         |         |            |              | 10.6       |
|             | THQ                              |                             |        | 0.8         | 0.8        | <b>1.0</b>  | 0.9         |         |            |              | 0.9        |
|             | P <sub>TV</sub> /V <sub>TV</sub> |                             |        | 23.4        | 24.0       | <b>32.6</b> | 26.9        |         |            |              | 28.2       |
|             | # of excitations                 |                             |        | 2           | 2          | 2           | 2           |         |            |              | 3          |
| Pat Model 6 | SAR <sub>max</sub> (TV)          |                             |        | 65.4        | 71.6       | <b>88.7</b> | 71.2        |         |            |              |            |
|             | SAF                              |                             |        | 2.5         | 3.3        | 3.4         | <b>3.4</b>  |         |            |              |            |
|             | TC <sub>SAR&gt;Lim</sub>         |                             |        | 30.9        | 36.3       | <b>41.0</b> | 37.7        |         |            |              |            |
|             | THQ                              |                             |        | 1.0         | <b>1.2</b> | 1.1         | 1.1         |         |            |              |            |
|             | P <sub>TV</sub> /V <sub>TV</sub> |                             |        | 32.6        | 36.6       | <b>39.2</b> | 36.5        |         |            |              |            |
|             | # of excitations                 |                             |        | 2           | 2          | 2           | 2           |         |            |              |            |
| Pat Model 7 | SAR <sub>max</sub> (TV)          |                             |        | 62.4        | 73.9       | 74.5        | <b>74.6</b> |         |            |              |            |
|             | SAF                              |                             |        | <b>3.8</b>  | 3.7        | 3.4         | 3.4         |         |            |              |            |
|             | TC <sub>SAR&gt;Lim</sub>         |                             |        | 37.9        | 46.7       | 56.1        | <b>61.1</b> |         |            |              |            |
|             | THQ                              |                             |        | 1.2         | 1.2        | <b>1.2</b>  | <b>1.2</b>  |         |            |              |            |
|             | P <sub>TV</sub> /V <sub>TV</sub> |                             |        | 32.0        | 35.0       | 36.6        | <b>37.1</b> |         |            |              |            |
|             | # of excitations                 |                             |        | 2           | 2          | 2           | 2           |         |            |              |            |
| Pat Model 8 | SAR <sub>max</sub> (TV)          |                             |        | 55.7        | 57.5       | <b>67.1</b> | 50.2        |         |            |              |            |
|             | SAF                              |                             |        | <b>2.1</b>  | 1.9        | 1.9         | 1.7         |         |            |              |            |
|             | TC <sub>SAR&gt;Lim</sub>         |                             |        | <b>11.7</b> | 6.4        | 10.7        | 7.8         |         |            |              |            |
|             | THQ                              |                             |        | 0.8         | <b>0.9</b> | <b>0.9</b>  | 0.8         |         |            |              |            |
|             | P <sub>TV</sub> /V <sub>TV</sub> |                             |        | 24.4        | 23.7       | <b>24.7</b> | <b>24.7</b> |         |            |              |            |

|                    |                                  |      |      |             |            |
|--------------------|----------------------------------|------|------|-------------|------------|
|                    | # of excitations                 | 3    | 3    | 2           | 3          |
| <b>Pat Model 9</b> | SAR <sub>max</sub> (TV)          | 53.3 | 53.0 | <b>75.4</b> | 71.9       |
|                    | SAF                              | 1.9  | 1.9  | 2.0         | <b>2.1</b> |
|                    | TC <sub>SAR&gt;Lim</sub>         | 17.9 | 21.3 | <b>53.5</b> | 50.3       |
|                    | THQ                              | 0.9  | 0.9  | <b>1.2</b>  | 1.1        |
|                    | P <sub>TV</sub> /V <sub>TV</sub> | 29.1 | 30.6 | <b>41.0</b> | 39.8       |
|                    | # of excitations                 | 3    | 3    | 2           | 3          |

Table S3. Full MVFS optimization HTP results.

|             |                                  | MVFS Optimization |        |        |        |         |         |         |         |           |           |
|-------------|----------------------------------|-------------------|--------|--------|--------|---------|---------|---------|---------|-----------|-----------|
|             |                                  | 8.P.R             | 16.P.R | 16.I.R | 16.I.E | 16.2R.R | 16.2R.E | 32.2R.R | 32.2R.E | 16.I.R.WB | 16.I.E.WB |
| Pat Model 1 | SAR <sub>max</sub> (TV)          | 59.5              | 74.0   | 104.6  | 114.6  | 119.5   | 134.2   | 112.9   | 121.9   | 112.4     | 80.0      |
|             | SAF                              | 2.0               | 2.0    | 2.6    | 2.9    | 2.8     | 3.3     | 2.6     | 3.1     | 3.1       | 3.7       |
|             | TC <sub>SAR&gt;Lim</sub>         | 17.3              | 46.2   | 63.9   | 67.4   | 83.5    | 76.5    | 83.0    | 82.7    | 39.9      | 55.3      |
|             | THQ                              | 0.8               | 1.1    | 1.2    | 1.3    | 1.5     | 1.5     | 1.4     | 1.5     | 1.1       | 1.1       |
|             | P <sub>TV</sub> /V <sub>TV</sub> | 27.2              | 34.9   | 41.5   | 45.1   | 49.4    | 66.8    | 48.5    | 51.5    | 35.3      | 40.1      |
|             | # of excitations                 | 2                 | 2      | 2      | 2      | 2       | 2       | 2       | 3       | 1         | 2         |
| Pat Model 2 | SAR <sub>max</sub> (TV)          | 53.1              | 51.4   | 55.6   | 62.0   | 74.0    | 75.5    | 81.8    | 117.5   |           | 55.0      |
|             | SAF                              | 2.6               | 2.3    | 3.2    | 3.3    | 3.4     | 3.4     | 3.9     | 3.6     |           | 3.8       |
|             | TC <sub>SAR&gt;Lim</sub>         | 20.3              | 17.9   | 40.5   | 44.3   | 83.4    | 73.7    | 84.0    | 83.6    |           | 37.4      |
|             | THQ                              | 0.9               | 0.9    | 1.0    | 1.1    | 1.3     | 1.2     | 1.3     | 1.4     |           | 1.0       |
|             | P <sub>TV</sub> /V <sub>TV</sub> | 25.6              | 25.3   | 31.3   | 31.6   | 37.8    | 35.0    | 38.1    | 40.0    |           | 31.6      |
|             | # of excitations                 | 2                 | 2      | 2      | 2      | 2       | 2       | 2       | 2       |           | 2         |
| Pat Model 3 | SAR <sub>max</sub> (TV)          | 66.1              | 81.5   | 98.2   | 90.9   | 104.3   | 100.8   | 114.4   | 109.1   |           | 99.3      |
|             | SAF                              | 2.2               | 2.9    | 2.6    | 2.7    | 2.6     | 2.6     | 2.9     | 2.8     |           | 3.4       |
|             | TC <sub>SAR&gt;Lim</sub>         | 24.2              | 56.6   | 75.4   | 66.5   | 87.0    | 79.9    | 96.9    | 94.2    |           | 71.8      |
|             | THQ                              | 1.0               | 1.1    | 1.3    | 1.2    | 1.4     | 1.3     | 1.5     | 1.4     |           | 1.3       |
|             | P <sub>TV</sub> /V <sub>TV</sub> | 26.3              | 39.7   | 45.7   | 42.4   | 48.7    | 46.9    | 53.1    | 51.6    |           | 45.8      |
|             | # of excitations                 | 3                 | 2      | 1      | 2      | 2       | 2       | 2       | 2       |           | 1         |
| Pat Model 4 | SAR <sub>max</sub> (TV)          |                   |        | 58.2   | 58.3   | 59.9    | 66.9    |         |         |           | 61.3      |
|             | SAF                              |                   |        | 2.3    | 2.5    | 2.1     | 2.2     |         |         |           | 3.1       |
|             | TC <sub>SAR&gt;Lim</sub>         |                   |        | 38.4   | 42.6   | 49.1    | 50.8    |         |         |           | 49.0      |
|             | THQ                              |                   |        | 1.0    | 1.0    | 1.1     | 1.1     |         |         |           | 1.1       |
|             | P <sub>TV</sub> /V <sub>TV</sub> |                   |        | 34.5   | 35.3   | 36.3    | 37.4    |         |         |           | 36.5      |
|             | # of excitations                 |                   |        | 3      | 2      | 3       | 2       |         |         |           | 2         |
| Pat Model 5 | SAR <sub>max</sub> (TV)          |                   |        | 52.4   | 56.2   | 86.1    | 66.2    |         |         |           | 58.5      |
|             | SAF                              |                   |        | 3.1    | 3.7    | 3.4     | 3.2     |         |         |           | 3.3       |
|             | TC <sub>SAR&gt;Lim</sub>         |                   |        | 26.4   | 35.6   | 76.5    | 58.2    |         |         |           | 46.9      |
|             | THQ                              |                   |        | 1.0    | 1.0    | 1.3     | 1.1     |         |         |           | 1.0       |
|             | P <sub>TV</sub> /V <sub>TV</sub> |                   |        | 29.9   | 31.1   | 47.7    | 34.4    |         |         |           | 34.0      |
|             | # of excitations                 |                   |        | 3      | 2      | 3       | 2       |         |         |           | 3         |
| Pat Model 6 | SAR <sub>max</sub> (TV)          |                   |        | 126.4  | 112.3  | 143.9   | 119.0   |         |         |           |           |
|             | SAF                              |                   |        | 4.1    | 3.7    | 3.7     | 3.1     |         |         |           |           |
|             | TC <sub>SAR&gt;Lim</sub>         |                   |        | 80.8   | 83.1   | 80.9    | 79.8    |         |         |           |           |
|             | THQ                              |                   |        | 1.5    | 1.5    | 1.6     | 1.5     |         |         |           |           |
|             | P <sub>TV</sub> /V <sub>TV</sub> |                   |        | 53.1   | 53.6   | 56.8    | 53.5    |         |         |           |           |
|             | # of excitations                 |                   |        | 2      | 2      | 2       | 2       |         |         |           |           |
| Pat Model 7 | SAR <sub>max</sub> (TV)          |                   |        | 87.8   | 107.0  | 97.8    | 114.3   |         |         |           |           |
|             | SAF                              |                   |        | 3.8    | 3.9    | 3.5     | 4.0     |         |         |           |           |
|             | TC <sub>SAR&gt;Lim</sub>         |                   |        | 77.6   | 89.7   | 90.5    | 95.8    |         |         |           |           |
|             | THQ                              |                   |        | 1.3    | 1.5    | 1.5     | 1.6     |         |         |           |           |
|             | P <sub>TV</sub> /V <sub>TV</sub> |                   |        | 42.8   | 49.0   | 47.1    | 52.8    |         |         |           |           |
|             | # of excitations                 |                   |        | 2      | 2      | 2       | 2       |         |         |           |           |
| Pat Model 8 | SAR <sub>max</sub> (TV)          |                   |        | 95.2   | 107.5  | 115.8   | 90.5    |         |         |           |           |
|             | SAF                              |                   |        | 2.6    | 2.7    | 2.5     | 2.5     |         |         |           |           |
|             | TC <sub>SAR&gt;Lim</sub>         |                   |        | 53.0   | 61.7   | 63.1    | 58.3    |         |         |           |           |
|             | THQ                              |                   |        | 1.1    | 1.2    | 1.2     | 1.2     |         |         |           |           |
|             | P <sub>TV</sub> /V <sub>TV</sub> |                   |        | 36.3   | 38.6   | 41.0    | 38.1    |         |         |           |           |

| # of excitations |                                  | 2    | 3    | 2           | 2           |
|------------------|----------------------------------|------|------|-------------|-------------|
| Pat Model 9      | SAR <sub>max</sub> (TV)          | 82.8 | 88.3 | 96.9        | <b>99.7</b> |
|                  | SAF                              | 2.3  | 2.3  | 2.4         | <b>2.4</b>  |
|                  | TC <sub>SAR&gt;Lim</sub>         | 56.7 | 64.8 | <b>69.3</b> | 69.0        |
|                  | THQ                              | 1.2  | 1.2  | 1.3         | <b>1.3</b>  |
|                  | P <sub>TV</sub> /V <sub>TV</sub> | 41.5 | 44.5 | 48.3        | <b>49.1</b> |
| # of excitations |                                  | 3    | 2    | 3           | 3           |

The highest value of each metric per patient model and optimization algorithm is highlighted in bold. The inter-algorithm maximum is further highlighted by green font. The overall (inter-algorithm and inter-patient) maximum is further highlighted by a green background.
